# Supplementary material for: Molecular isomerism induced Fe(ii) spin state difference based on the tautomerization of the 4(5)-methylimidazole group
Source: Royal Society of Chemistry journal article supplement (doi:10.1039/c7dt00260b), 2017-01-01
Supplement: c7dt00260b1.pdf [file c7dt00260b1.pdf]

## *Electronic Supporting Information for*

### **Molecular isomerism induced Fe(II) spin state difference based on tautomerization of 4(5)-methylimidazole group**

*Wang-Kang Han<sup>a</sup>, Zhi-Hua Li<sup>a</sup>, Wei Zhu<sup>a</sup>, Tao Li<sup>a</sup>, Zaijun Li<sup>a</sup>, Xuehong Ren<sup>b</sup> and Zhi-Guo Gu<sup>a\*</sup>*

*<sup>a</sup> The Key Laboratory of Food Colloids and Biotechnology, Ministry of Education, School of Chemical and Material Engineering, Jiangnan University, Wuxi 214122, P.R. China*

*<sup>b</sup> The Key Laboratory of Eco-textiles of Ministry of Education, College of Textiles and Clothing, Jiangnan University, Wuxi 214122, P.R. China*

E-mail: zhiguogu@jiangnan.edu.cn

## 1. The fast tautomerization process of 4(5)-methylimidazole-2-carbaldehyde

The tautomerization of proton transfer in 4(5)-methylimidazole group is typically a very fast process, and the peaks associated with each tautomer even could not be discernible through  $^1\text{H}$  NMR.

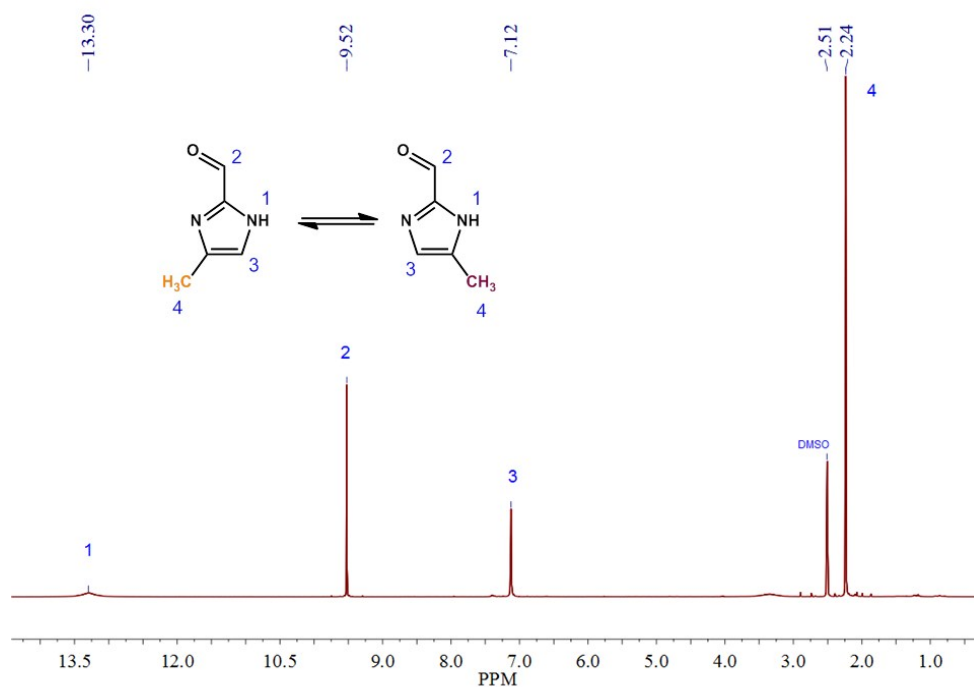

*Figure. S1.*  $^1\text{H}$  NMR spectrum of 4(5)-methylimidazole-2-carbaldehyde.

## 2. Characterizations of 4(5)-MHIC

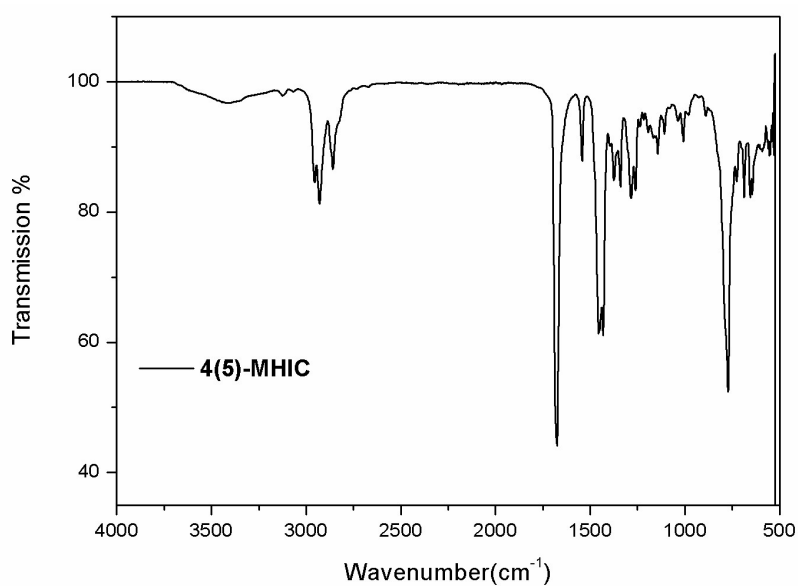

*Figure. S2.* ATR-FTIR spectrum of 4(5)-MHIC.

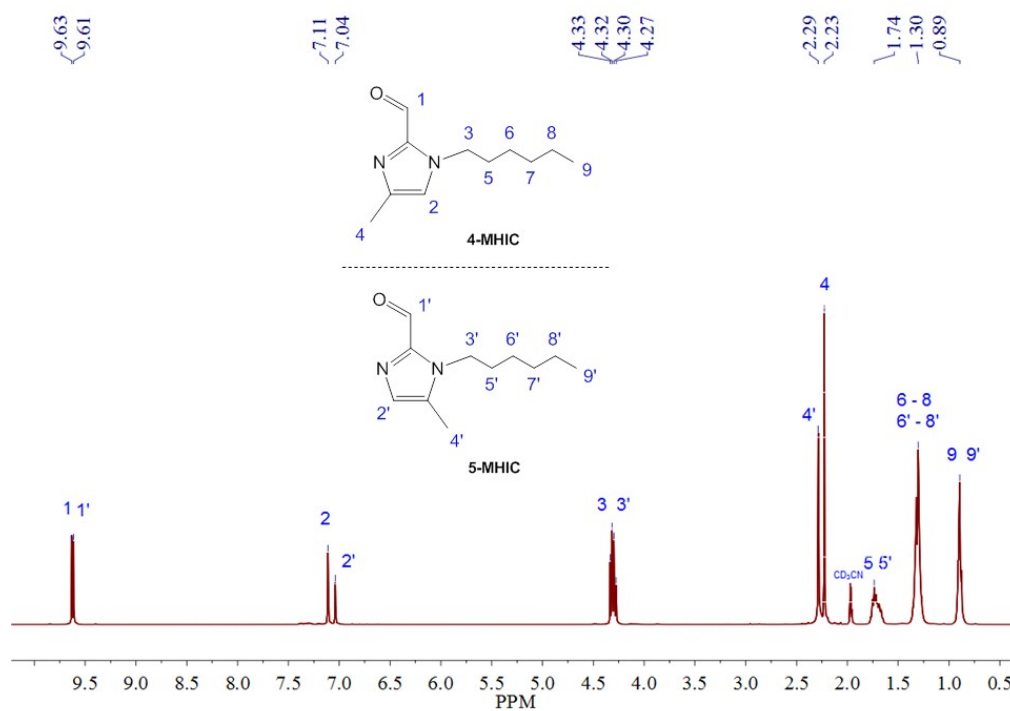

**Figure. S3.**  $^1\text{H}$  NMR spectrum of 4(5)-MHIC.

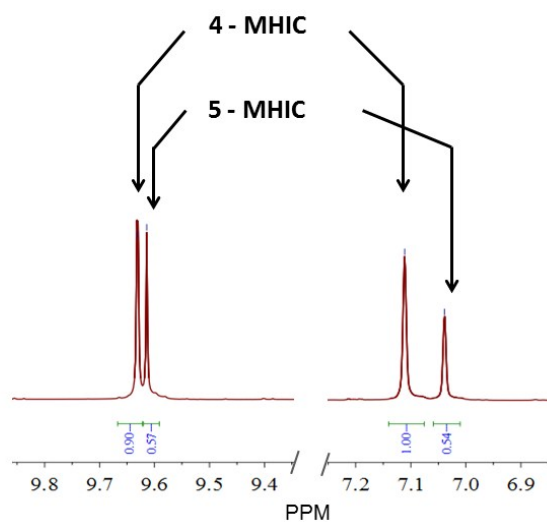

**Figure. S4.** Partial  $^1\text{H}$  NMR spectrum for 4(5)-MHIC showing relative intensities of peaks associated with the 4-methyl and 5-methyl tautomers.

### 3. Infrared (IR) spectra of complexes 1a, 1b and 2

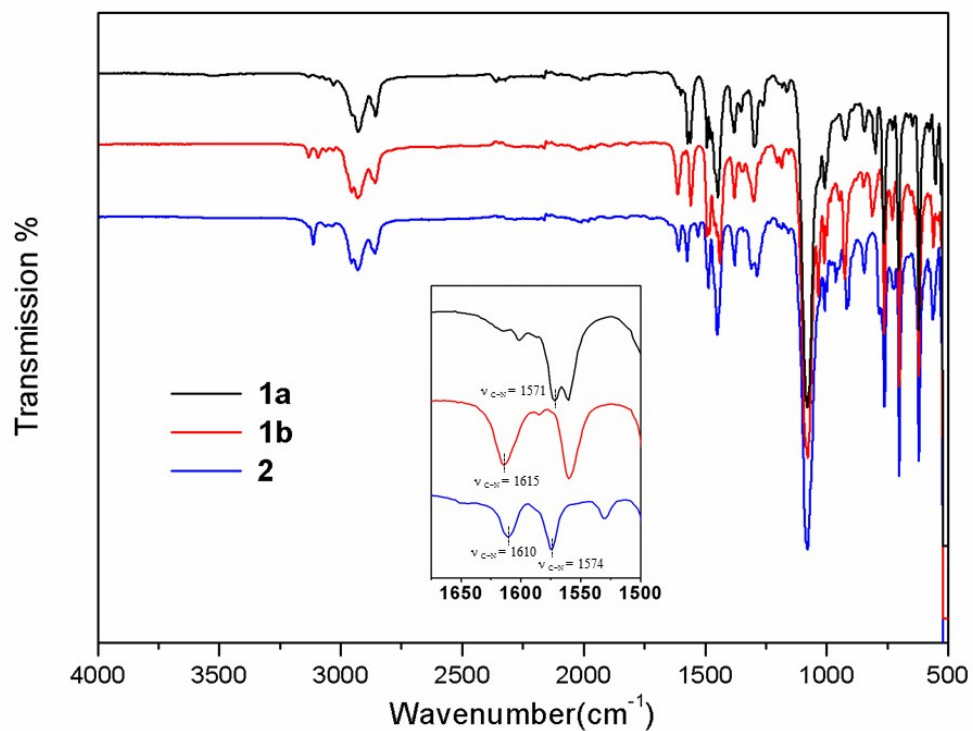

**Figure S5.** ATR FT-IR spectra of **1a**, **1b** and **2**.

### 4. UV/Vis spectra

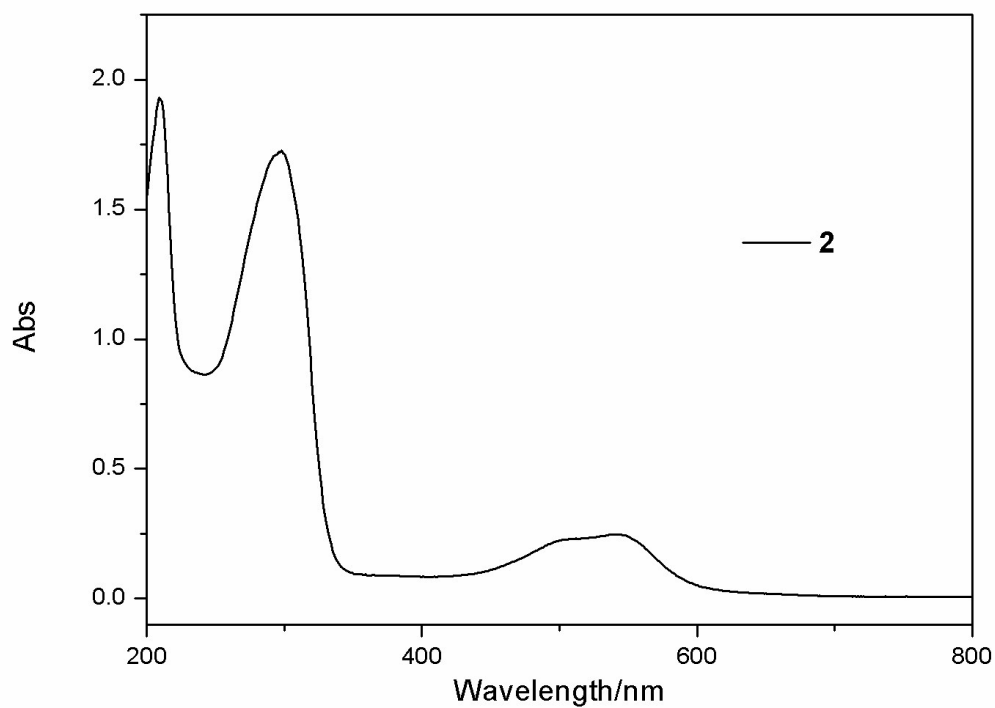

**Figure S6.** UV/Vis spectrum of **2** at room temperature in  $\text{CH}_3\text{CN}$  solution ( $10^{-5} \text{ mol} \cdot \text{L}^{-1}$ ).

## 5. Thermogravimetric analyses (TGA)

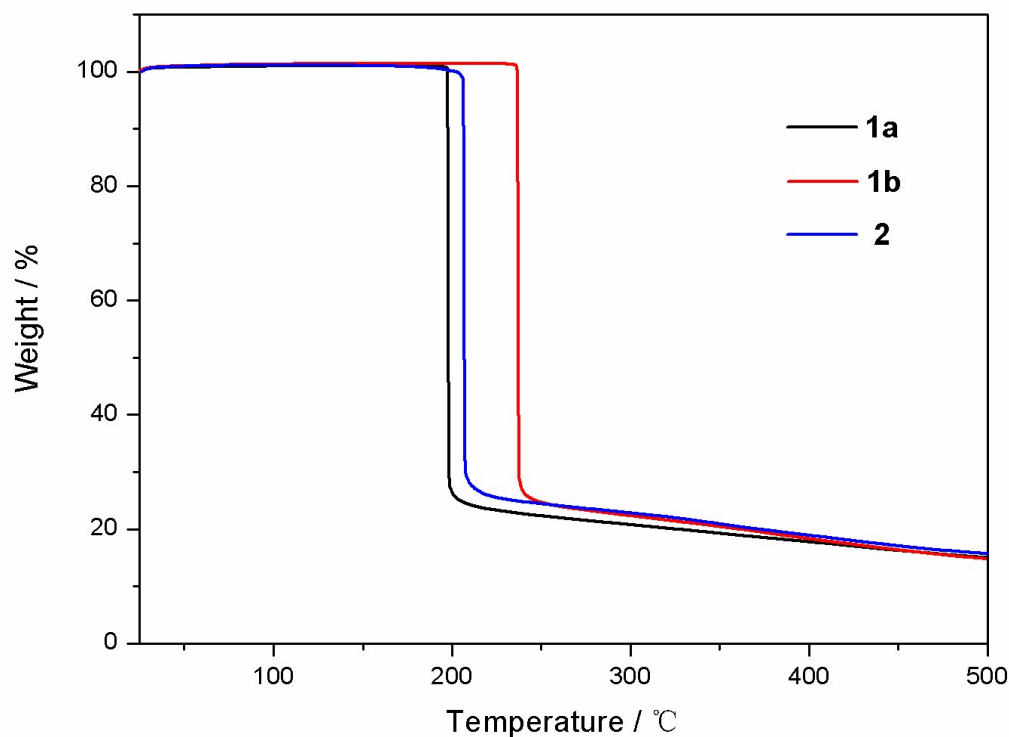

**Figure S7.** Thermogravimetric analyses (TGA) of **1a**, **1b** and **2**.

The weight of all three were nearly a constant following the increasing temperature until 197 °C for **1a**, 236 °C for **1b** and 206 °C for **2**, and then the complex started to decompose with abrupt losses of almost weight (76 percent for **1a**, 74 percent for **1b** and 71 percent for **2**). Further heated to 500 °C, there were approximate 14 percent of weight residual, which possibly corresponded to the iron oxides.

## 6. Crystal-packing diagram of complexes 1a, 1b and 2

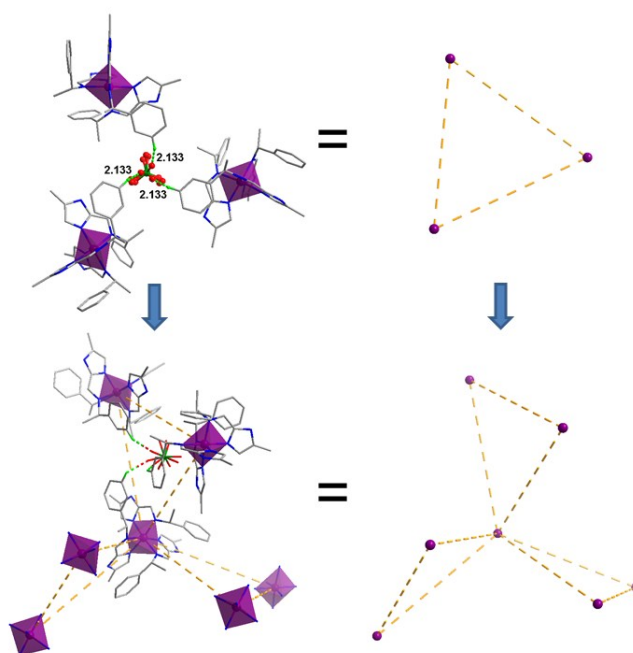

**Figure S8.** Representation of the crystal packing for **1a**. All H atoms and the N-alkyl chains in imidazole rings have been removed for clarity. Color code: C, gray; N, blue; Fe, violet; O, red; Cl, dark green; H-bonding interactions, green dashed lines.

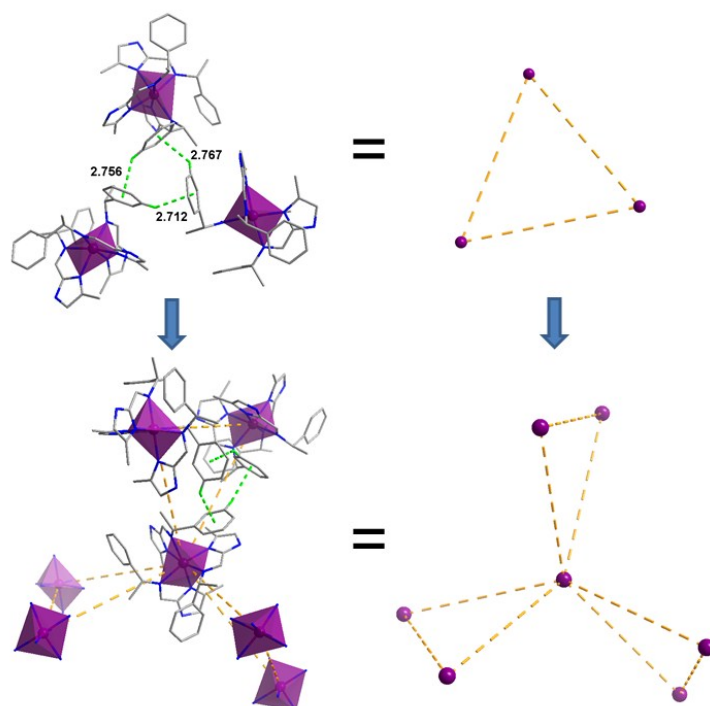

**Figure S9.** Representation of the crystal packing for **1b**. All H atoms, anions and the N-alkyl chains in imidazole rings have been removed for clarity. Color code: C, gray; N, blue; Fe, violet; C-H... $\pi$  interactions, green dashed lines.

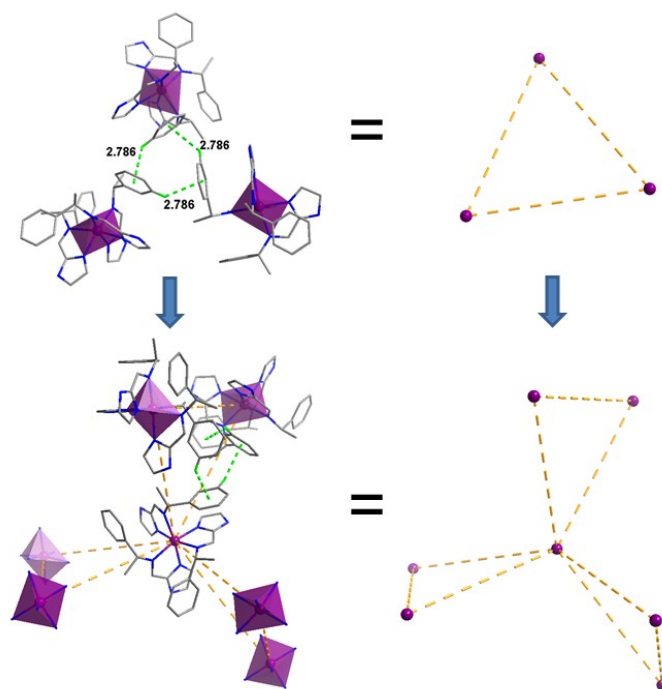

**Figure S10.** Representation of the crystal packing for **2**. All H atoms, anions and the N-alkyl chains in imidazole rings have been removed for clarity. Color code: C, gray; N, blue; Fe, violet; C-H $\cdots$  $\pi$  interactions, green dashed lines.

## 7. Powder X-ray diffraction (PXRD) of complexes **1a**, **1b** and **2**

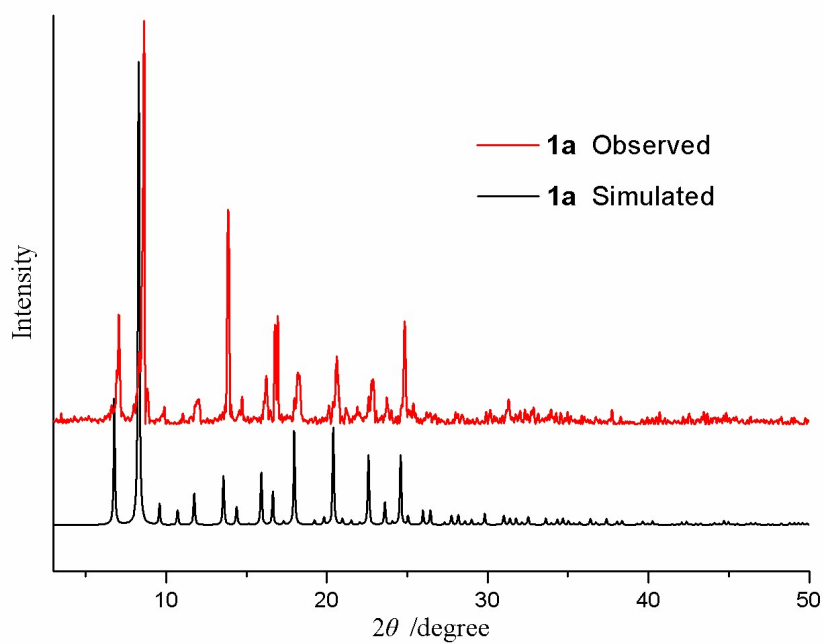

**Figure S11.** Observed and simulated powder X-ray diffraction (PXRD) of **1a**.

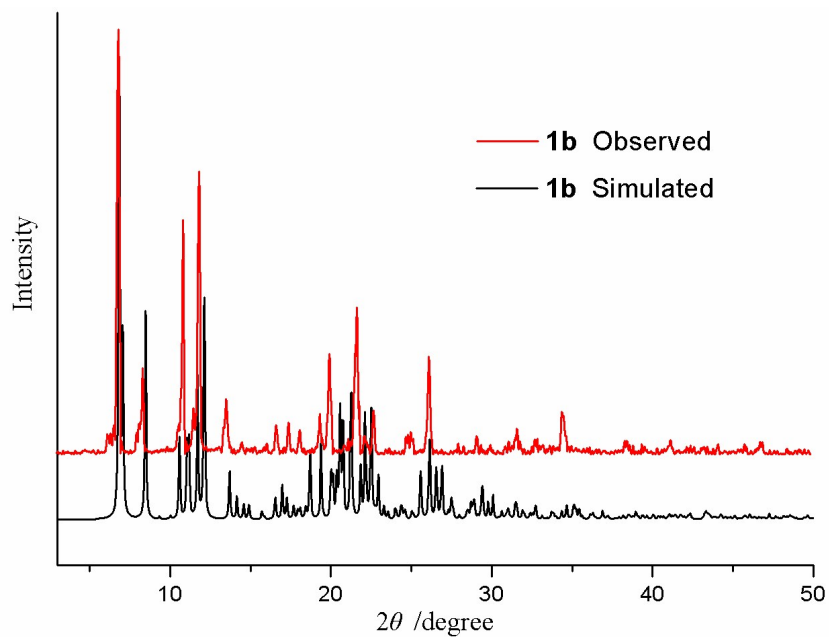

**Figure S12.** Observed and simulated powder X-ray diffraction (PXRD) of **1b**.

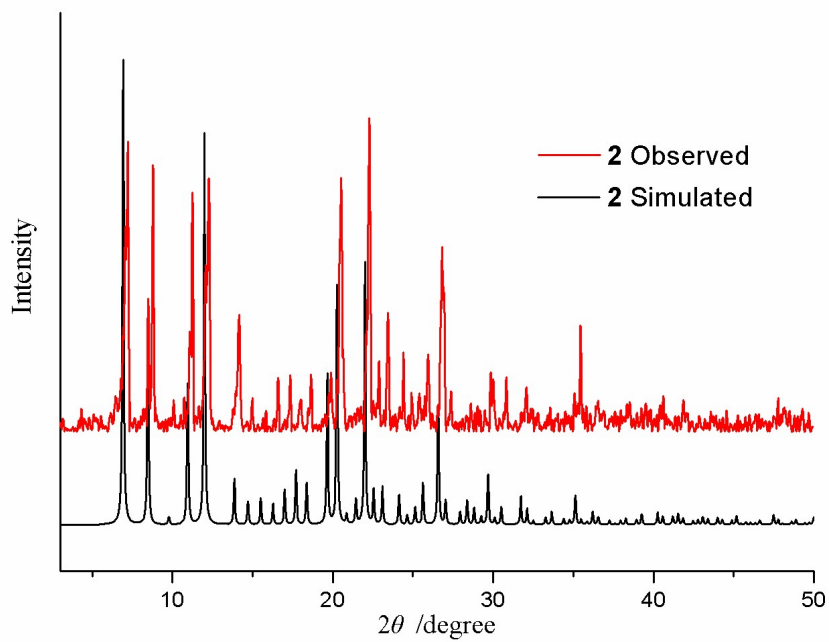

**Figure S13.** Observed and simulated powder X-ray diffraction (PXRD) of **2**.



## 8. X-ray crystallographic data

**Table S1.** Selected bond lengths [ $\text{\AA}$ ] and angles [ $^\circ$ ] for **1a**, **1b** and **2**.

| <b>1a</b>           |          | <b>1b</b>         |           | <b>2</b>            |            |
|---------------------|----------|-------------------|-----------|---------------------|------------|
| Fe(1)-N(1)          | 1.960(6) | Fe(1)-N(1A)       | 2.140(9)  | Fe(1)-N(1)#5        | 2.096(6)   |
| Fe(1)-N(1)#4        | 1.960(6) | Fe(1)-N(1B)       | 2.151(10) | Fe(1)-N(1)#6        | 2.096(6)   |
| Fe(1)-N(1)#3        | 1.960(6) | Fe(1)-N(1C)       | 2.168(9)  | Fe(1)-N(1)          | 2.096(6)   |
| Fe(1)-N(3)          | 1.982(7) | Fe(1)-N(3B)       | 2.204(9)  | Fe(1)-N(3)          | 2.196(6)   |
| Fe(1)-N(3)#4        | 1.982(7) | Fe(1)-N(3C)       | 2.208(9)  | Fe(1)-N(3)#5        | 2.196(6)   |
| Fe(1)-N(3)#3        | 1.982(7) | Fe(1)-N(3A)       | 2.237(9)  | Fe(1)-N(3)#6        | 2.196(6)   |
| N(1)-Fe(1)-N(1)#4   | 91.3(2)  | N(1A)-Fe(1)-N(1B) | 94.2(4)   | N(1)#5-Fe(1)-N(1)#6 | 90.5(2)    |
| N(1)-Fe(1)-N(1)#3   | 91.3(2)  | N(1A)-Fe(1)-N(1C) | 94.5(4)   | N(1)#5-Fe(1)-N(1)   | 90.5(2)    |
| N(1)#4-Fe(1)-N(1)#3 | 91.3(2)  | N(1B)-Fe(1)-N(1C) | 92.5(4)   | N(1)#6-Fe(1)-N(1)   | 90.5(2)    |
| N(1)-Fe(1)-N(3)     | 81.0(3)  | N(1A)-Fe(1)-N(3B) | 169.6(4)  | N(1)#5-Fe(1)-N(3)   | 167.7(2)   |
| N(1)#4-Fe(1)-N(3)   | 91.8(2)  | N(1B)-Fe(1)-N(3B) | 76.6(4)   | N(1)#6-Fe(1)-N(3)   | 91.4(2)    |
| N(1)#3-Fe(1)-N(3)   | 171.8(3) | N(1C)-Fe(1)-N(3B) | 91.0(4)   | N(1)-Fe(1)-N(3)     | 77.3(2)    |
| N(1)-Fe(1)-N(3)#4   | 171.8(3) | N(1A)-Fe(1)-N(3C) | 90.0(4)   | N(1)#5-Fe(1)-N(3)#5 | 77.3(2)    |
| N(1)#4-Fe(1)-N(3)#4 | 81.0(3)  | N(1B)-Fe(1)-N(3C) | 168.7(4)  | N(1)#6-Fe(1)-N(3)#5 | 167.7(2)   |
| N(1)#3-Fe(1)-N(3)#4 | 91.8(2)  | N(1C)-Fe(1)-N(3C) | 76.6(3)   | N(1)-Fe(1)-N(3)#5   | 91.4(2)    |
| N(3)-Fe(1)-N(3)#4   | 96.3(3)  | N(3B)-Fe(1)-N(3C) | 99.9(4)   | N(3)-Fe(1)-N(3)#5   | 100.89(17) |
| N(1)-Fe(1)-N(3)#3   | 91.8(2)  | N(1A)-Fe(1)-N(3A) | 77.0(4)   | N(1)#5-Fe(1)-N(3)#6 | 91.4(2)    |
| N(1)#4-Fe(1)-N(3)#3 | 171.8(3) | N(1B)-Fe(1)-N(3A) | 91.3(4)   | N(1)#6-Fe(1)-N(3)#6 | 77.3(2)    |
| N(1)#3-Fe(1)-N(3)#3 | 81.0(3)  | N(1C)-Fe(1)-N(3A) | 170.9(3)  | N(1)-Fe(1)-N(3)#6   | 167.7(2)   |
| N(3)-Fe(1)-N(3)#3   | 96.3(3)  | N(3B)-Fe(1)-N(3A) | 97.9(3)   | N(3)-Fe(1)-N(3)#6   | 100.89(17) |
| N(3)#4-Fe(1)-N(3)#3 | 96.3(3)  | N(3C)-Fe(1)-N(3A) | 99.9(3)   | N(3)#5-Fe(1)-N(3)#6 | 100.89(17) |

Symmetry transformations used to generate equivalent atoms for **1a**: #3  $-z+1, x+1/2, -y+3/2$ ; #4  $y-1/2, -z+3/2, -x+1$ ; for **2**: #5  $-y+1/2, -z+1, x+1/2$  #6  $z-1/2, -x+1/2, -y+1$

## 9. DFT calculations

**Table S2.** DFT calculated energy of different spin states for **1a**, **1b** and **2**.

|                                     | <b>1a</b>   | <b>1b</b>   | <b>2</b>    |
|-------------------------------------|-------------|-------------|-------------|
| $E_{HS}$ / a.u.                     | -2836.70949 | -2836.74990 | -2718.37369 |
| $E_{LS}$ / a.u.                     | -2836.74154 | -2836.70034 | -2718.36454 |
| $\Delta E_{HS-LS}$ / kJ mol $^{-1}$ | 84.15       | -130.10     | -24.03      |

$\Delta E_{HS-LS}$  in negative value means high-spin state is more stable.
